# Supplementary material for: Genome-Wide Identification of the SUN Gene Family in Melon (Cucumis melo) and Functional Characterization of Two CmSUN Genes in Regulating Fruit Shape Variation
Source: MDPI journal article supplement (doi:10.3390/ijms232416047), 2022-12-16
Supplement: s1 [file s1]

Table S1 Primer sequence associated with this article experiments.

| Primer of gene clone                                   |                                         |                                     |
|--------------------------------------------------------|-----------------------------------------|-------------------------------------|
| CmSUN23-24                                             | F: GCTCTAGAATGGGCTTTCTCCGCC             | R:CGGGATCCGATCATCTTGATTGGTACTTGCA   |
| CmSUN25-26-27c                                         | F:GCTCTAGAATGGGGAAAGCTACAAGGT           | R:CGGGATCCTCAAATTCATCAAACCCT        |
| Primer of subcellular localization                     |                                         |                                     |
| CmSUN23-24                                             | F: GGATCCATGGGCTTTCTCCGC                | R:GCTCTAGATCTTGATTGGTACTTGC         |
| CmSUN25-26-27c                                         | F:GGGGTACCATGGGGAAAGCTACAAGG            | R:CGGGATCCAAATTCATCAAACCCTTC        |
| Primer of yeast two-hybrid                             |                                         |                                     |
| pGBKT7-CmSUN23-24                                      | F:CGGGATCCATGGGCTTTCTCCGCC              | R:AACTGCAGGATCATCTTGATTGGTACTTGCA   |
| pGBKT7-CmSUN25-26-27c                                  | F:GGAATTC CATATGATGGGGAAAGCTACAAGGT     | R:CGGGATCCTCAAATTCATCAAACCCT        |
| pGBKT7-CmCAM5                                          | F:CGGGATCCCCTTCCTCATCAATTTCCATGG        | R:AACTGCAGCAGTTCGATTGATTCTCACTTGGC  |
| pGBKT7-CmCML11                                         | F:CGGGATCCCTGAAGAAAAAAAACATGACGGAAG     | R:AACTGCAGAAGCTACTTTTGAAACAATCATCCA |
| pGADT7-CmCAM5                                          | F:GGAATTCCTTCCTCATCAATTTCCATGG          | R:CGGGATCCCAGTTCGATTGATTCTCACTTGGC  |
| pGADT7-CmCML11                                         | F:GGAATTCATATGCTGAAGAAAAAAAACATGACGGAAG | R:CGGGATCCAAGCTACTTTTGAAACAATCATCCA |
| The qRT-PCR primer of <i>CmSUNs</i> and reference gene |                                         |                                     |
| CmSUN1-2a                                              | F:GAGTTCTACTGTGAAACGCCAAG               | R:TCCTCCAACATCCTAACCCTC             |
| CmSUN1-2b                                              | F:CCCACTCCTTTTGTGACTATTGC               | R:TTGGTGGCAGCGGTAGTAGAC             |

|                |                             |                               |
|----------------|-----------------------------|-------------------------------|
| CmSUN3         | F:TCGTCTATGGGAAACTAAGAGCAC  | R:TTGGAAACGGCTTGATGATGT       |
| CmSUN5         | F:ACTGCTGCCTCGCATTCTG       | R:CTCAGGTGCCAGTTTGTGCTT       |
| CmSUN9-10b     | F:ATTCAGACAGCATACCGAGCAT    | R:CTTTCTAACGGAATGACCTTGAGT    |
| CmSUN11        | F:CCACCAAAAGCAACGACGAC      | R:CGACCTCAACAGCAGCCTTAG       |
| CmSUN13-14a    | F:CATTCCTCTATTTAGGGAGCCAAG  | R:GAGGTGTTGGTGGTGAAGAAGG      |
| CmSUN13-14b    | F:AGAGATTTTTCACTTGTCAGTCAGG | R:GACACTGCTCGGCTTCCTAA        |
| CmSUN17-18a    | F:CCAATGGATGGCAAAGAAGC      | R:GGGAGATAAGTAGGAGTAGGGTCG    |
| CmSUN21a       | F:CGACGCCAAGGATTGAAGG       | R:CATAGCCAGCCAAGCGAACT        |
| CmSUN21b       | F:GGAGGAGGCAGTTGGTTCTT      | R:CATTTCTTAGCAGATTGAGGAGG     |
| CmSUN23-24     | F:ATTTGACAACCTCGGCACTTCTG   | R:TCTAACCAACTTGACCCGACTG      |
| CmSUN25-26-27a | F:TTTCTTCTCCACTCCCTTGTCG    | R:ATCGTGGAGTGCTCTGTGCC        |
| CmSUN25-26-27c | F:GAGAAGGGTATTATCGTGGGTATG  | R:CCATTATCTCATTCAACGCCACT     |
| CmSUN30-31     | F:GCCAAGGCATCGGAAACTAC      | R:GGTAACTTTTGGCACCCCTTC       |
| CmGAPDH        | F:GTTTTACCGACAAAGACAAAGCTG  | R:TCCGGCTTGTAATTCCTTCTCGTTAAC |
